# Supplementary material
Source: Springer Nature journal article supplement (https://www.springermedizin.de/resource/supplementary/12985_2014_2477_MOESM3_ESM.pdf/9606812)

**A**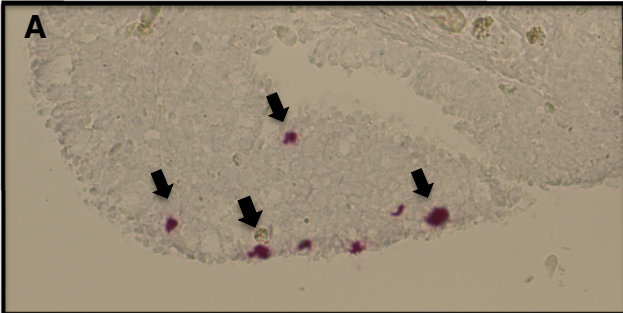**B**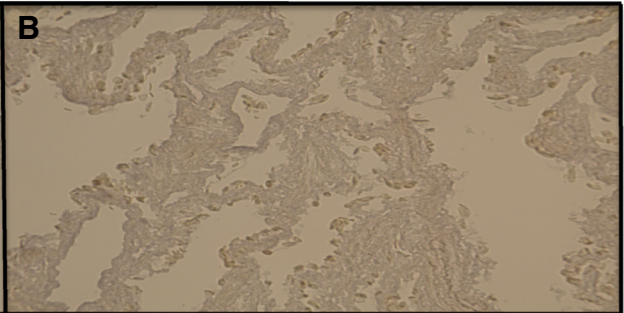

Supplement: MOESM3 [file 9606812]
